# Supplementary material for: Structural covariance of amygdala subregions is associated with trait aggression and endogenous testosterone in healthy individuals
Source: bioRxiv or medRxiv preprint supplement (doi:10.1101/2021.07.09.451771), 2021-07-09
Supplement: Supplementary file [file media-1.pdf]

**Structural covariance of amygdala subregions is associated with trait aggression and endogenous testosterone in healthy individuals**

Martin Göttlich<sup>1,2,++</sup>, Macià Buades-Rotger<sup>1,3,4,++</sup>, Juliana Wiechert<sup>1</sup>, Frederike Beyer<sup>5</sup>, Ulrike M. Krämer<sup>1,2,3,\*</sup>

**Supplementary materials**

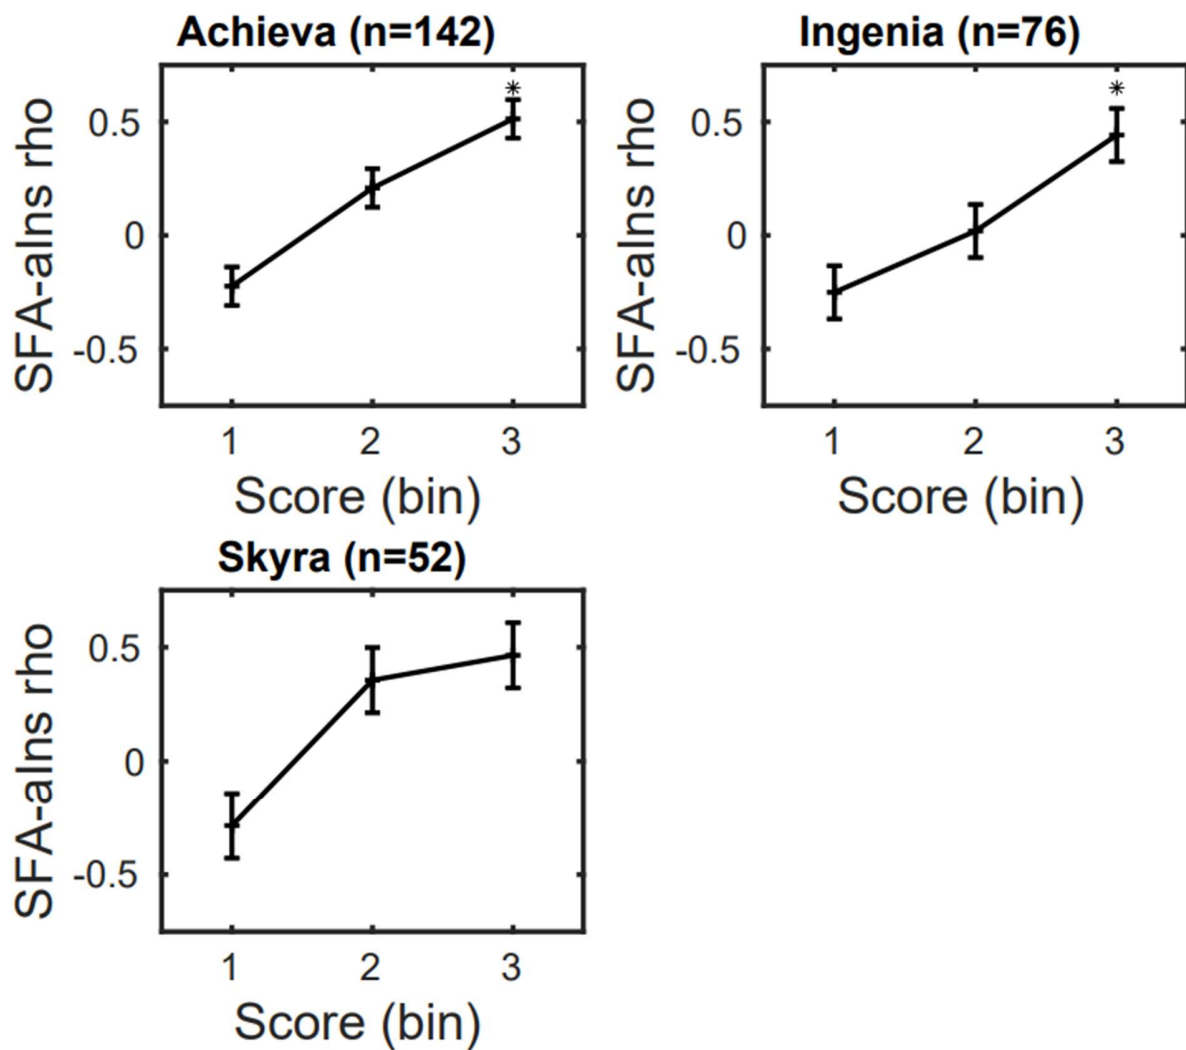

Figure S1: Correlation between the superficial amygdala subgroup and anterior insula volume as a function of increasing trait aggression for the three different datasets separately. The results of all three different subsets are compatible.

**Table S1. Correlation (Pearson's rho) between CM, LB, and SF amygdala volume and testosterone.**

|          | Male subjects (n=40) |       | Female subjects (n=36) |              |
|----------|----------------------|-------|------------------------|--------------|
|          | rho                  | p     | rho                    | p            |
| CM left  | -0.11                | 0.511 | -0.02                  | 0.906        |
| CM right | 0.01                 | 0.967 | <b>-0.45</b>           | <b>0.006</b> |
| LB left  | -0.02                | 0.892 | 0.00                   | 0.989        |
| LB right | -0.06                | 0.723 | -0.19                  | 0.265        |
| SF left  | 0.07                 | 0.669 | -0.04                  | 0.811        |
| SF right | -0.02                | 0.914 | -0.19                  | 0.263        |
